# Supplementary material for: PRRX1 induced by BMP signaling decreases tumorigenesis by epigenetically regulating glioma‐initiating cell properties via DNA methyltransferase 3A
Source: PubMed Central journal article supplement (PMC8732353; doi:10.1002/1878-0261.13051), 2021-07-16

A

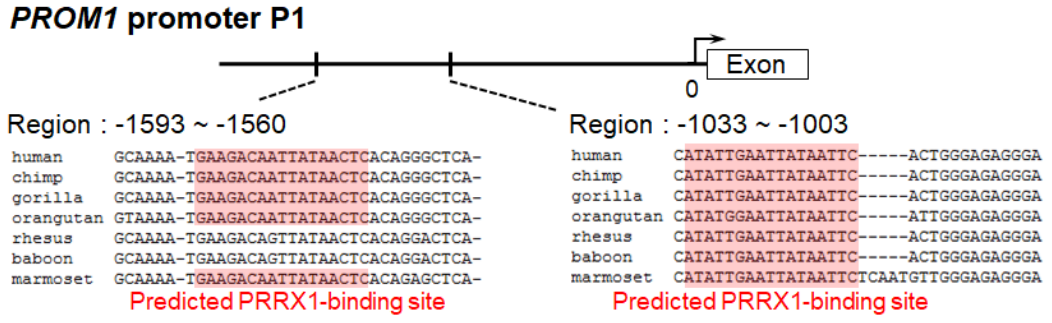

B

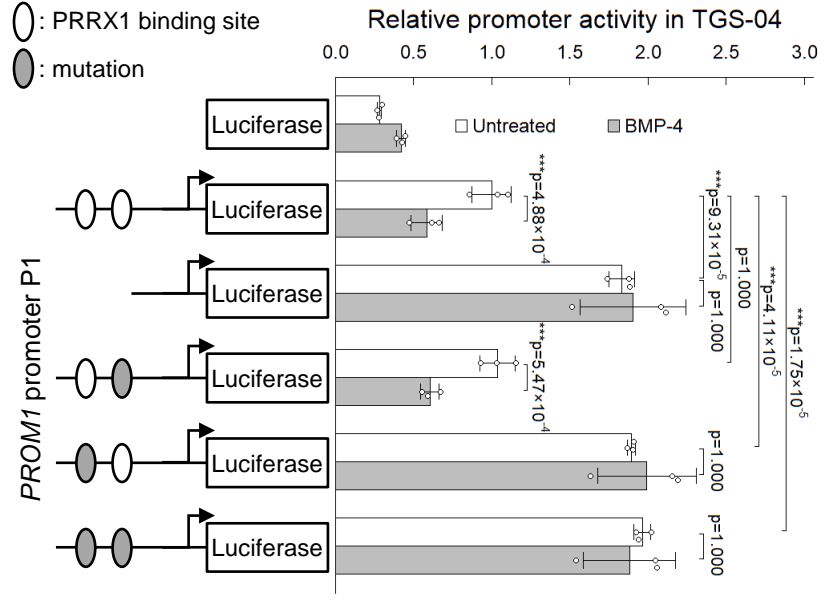

Supplementary Figure S2.

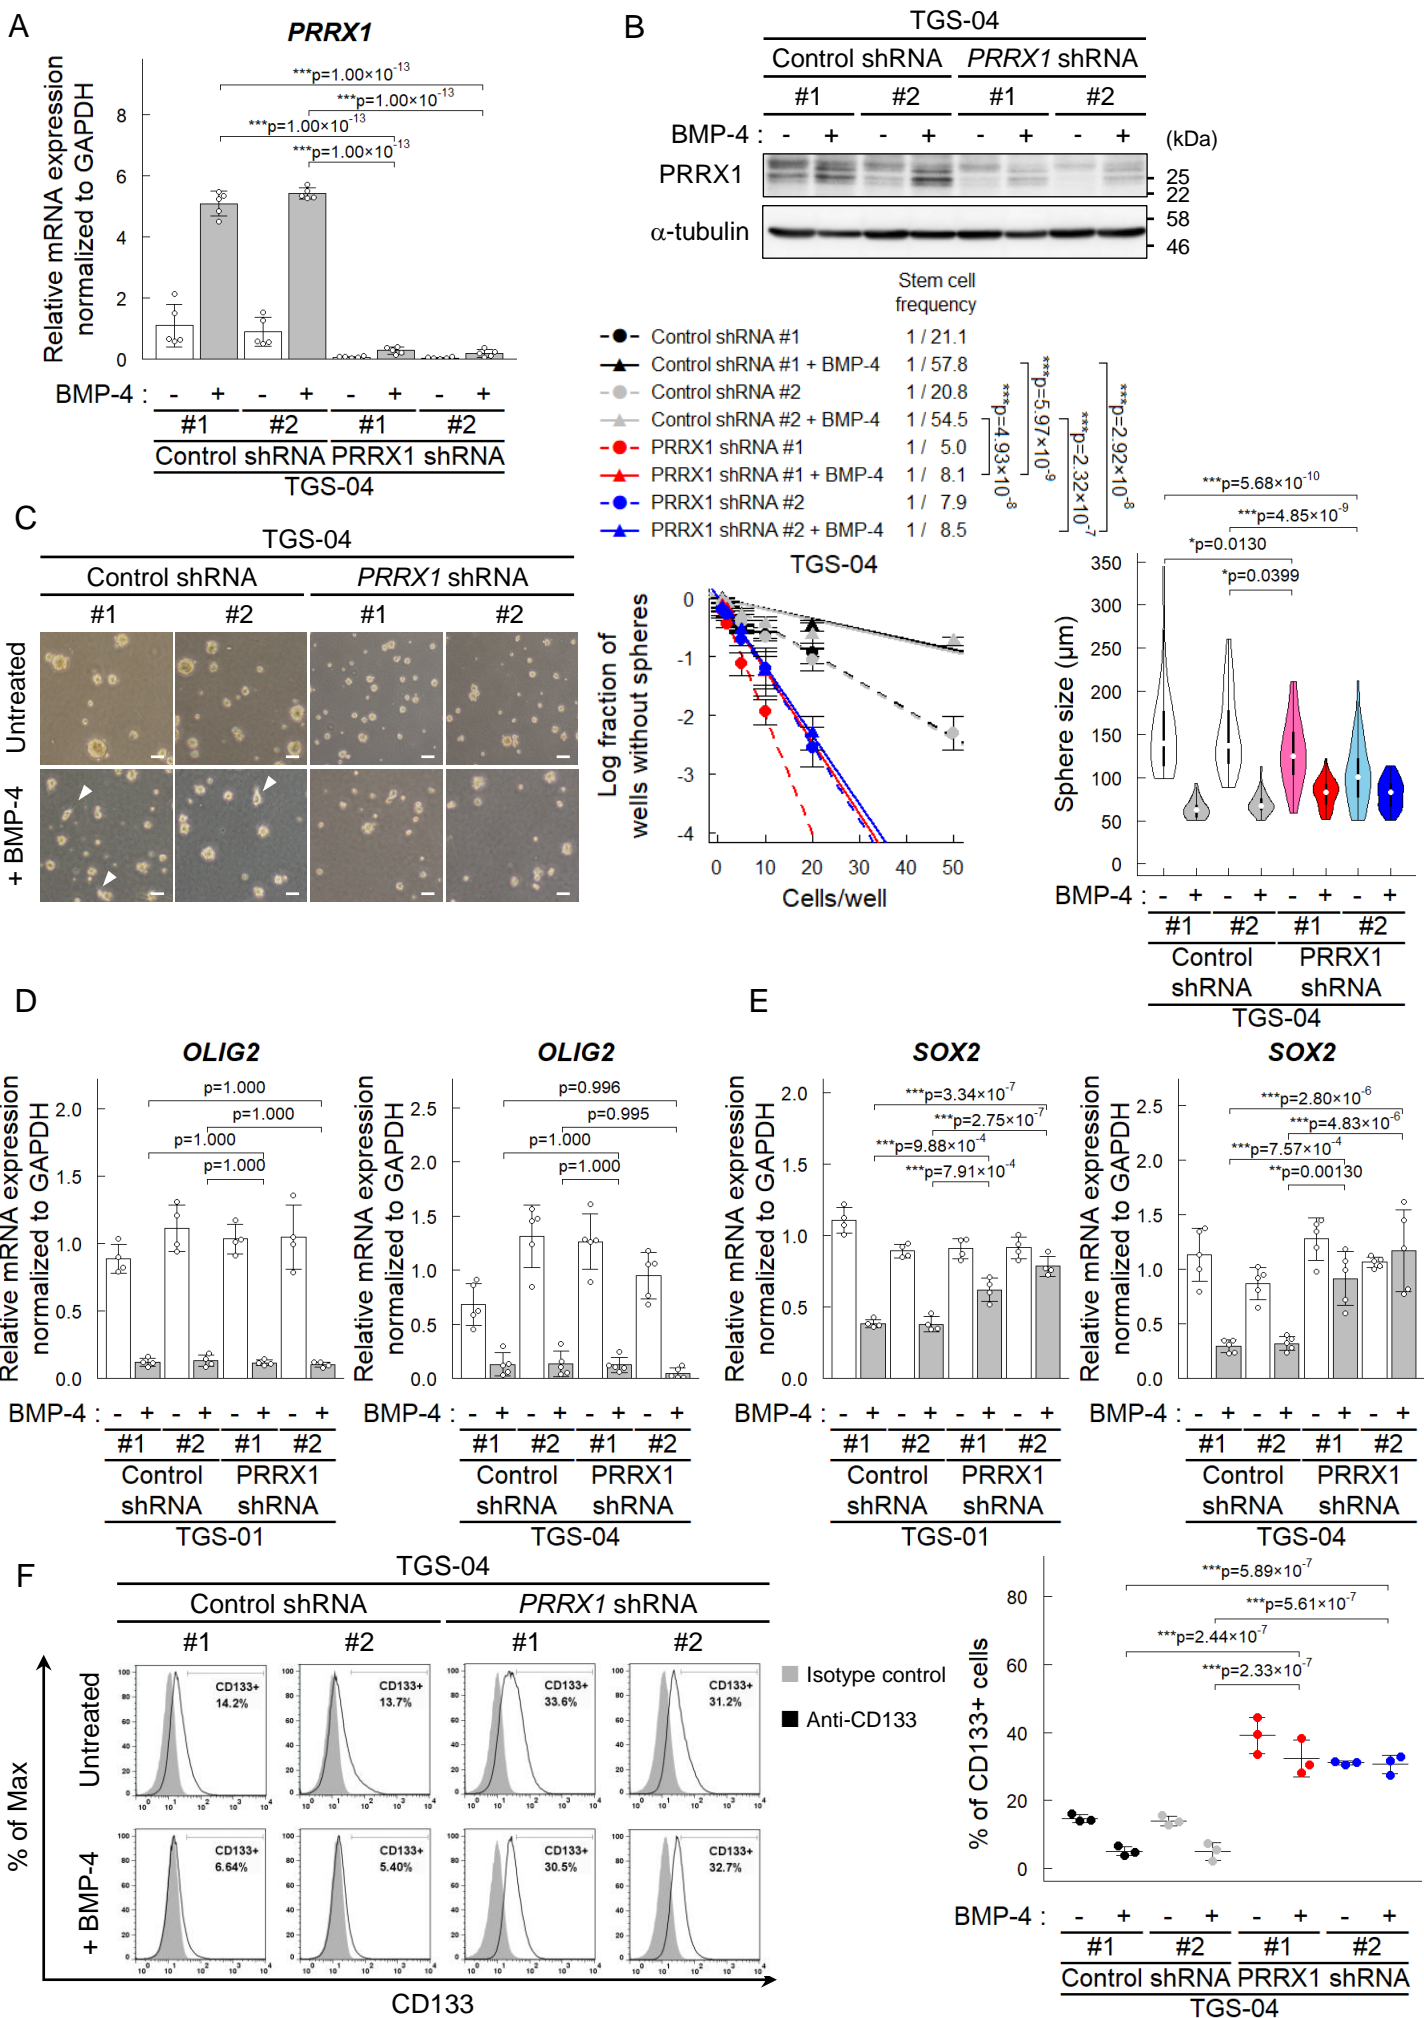

A

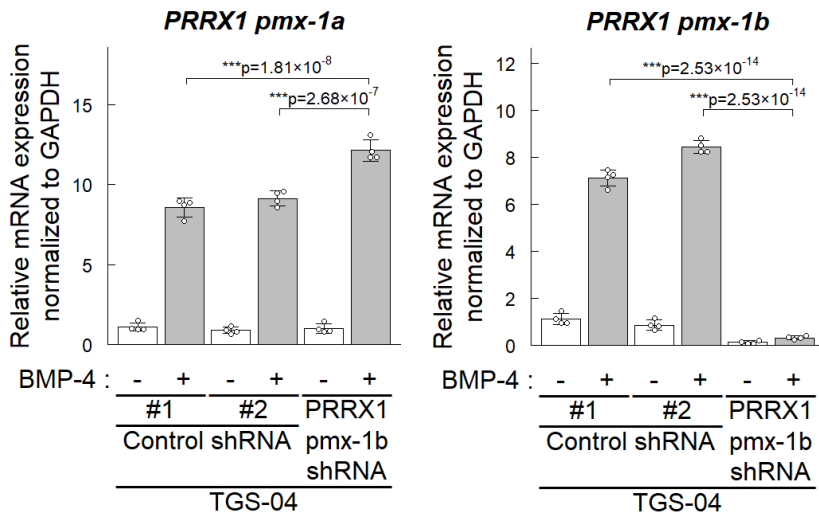

B

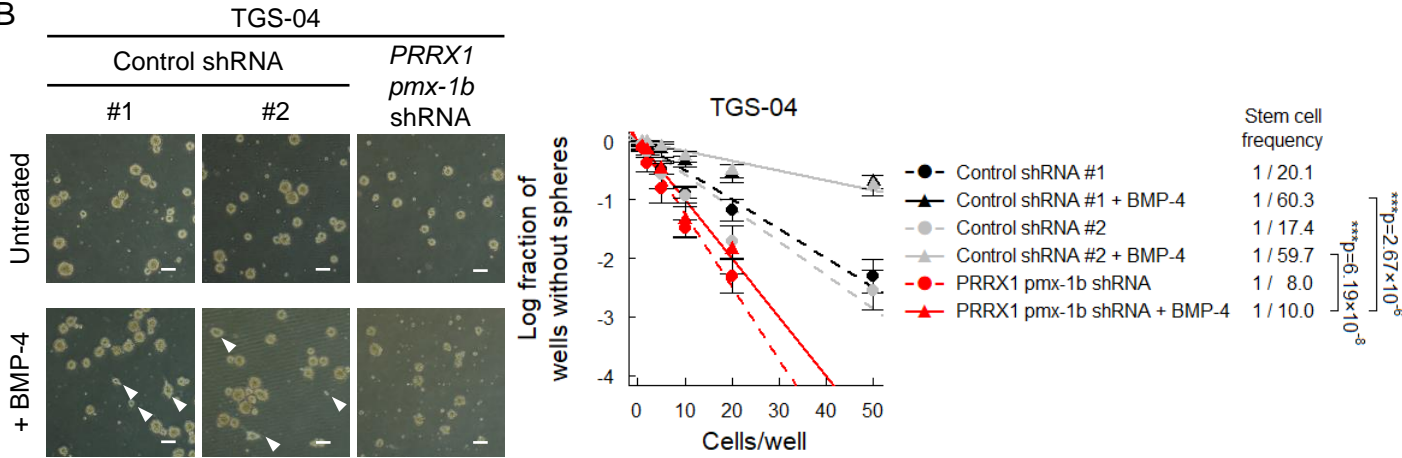

C

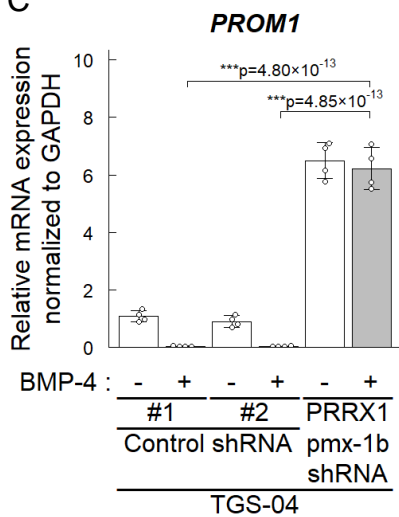

D

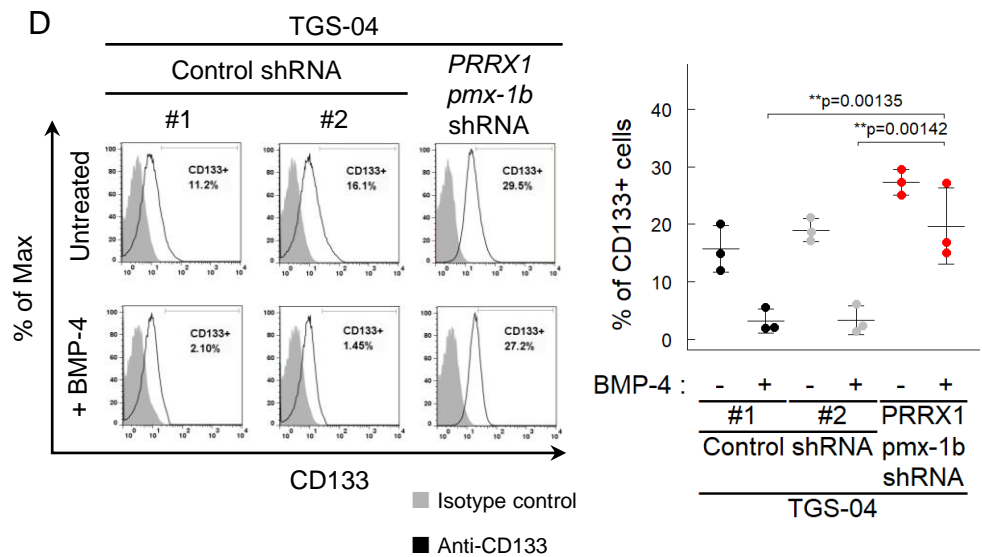

Supplementary Figure S4.

A

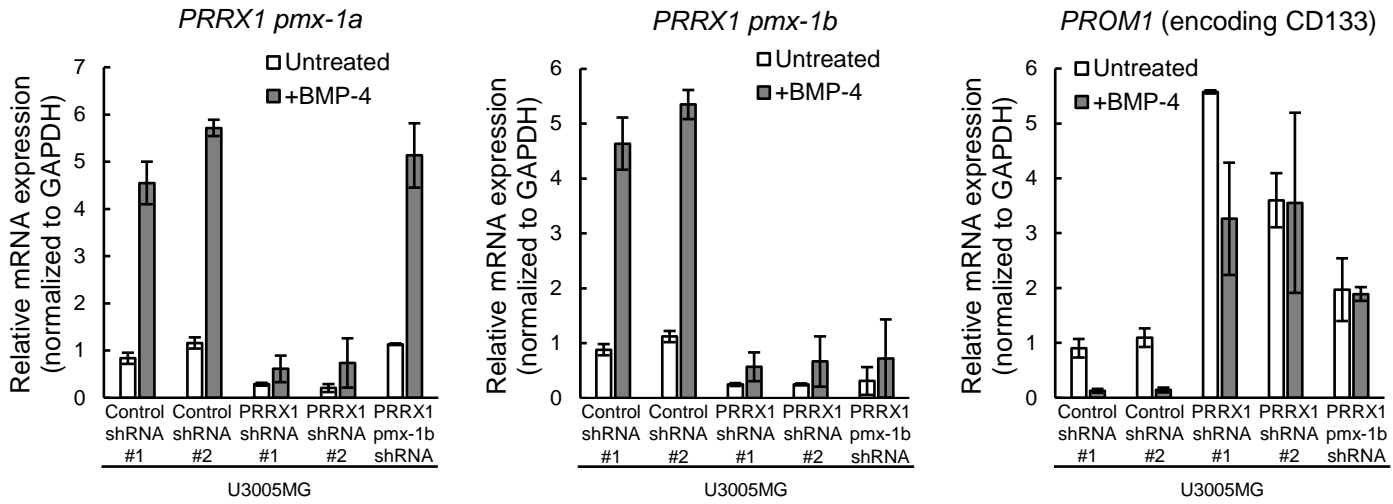

B

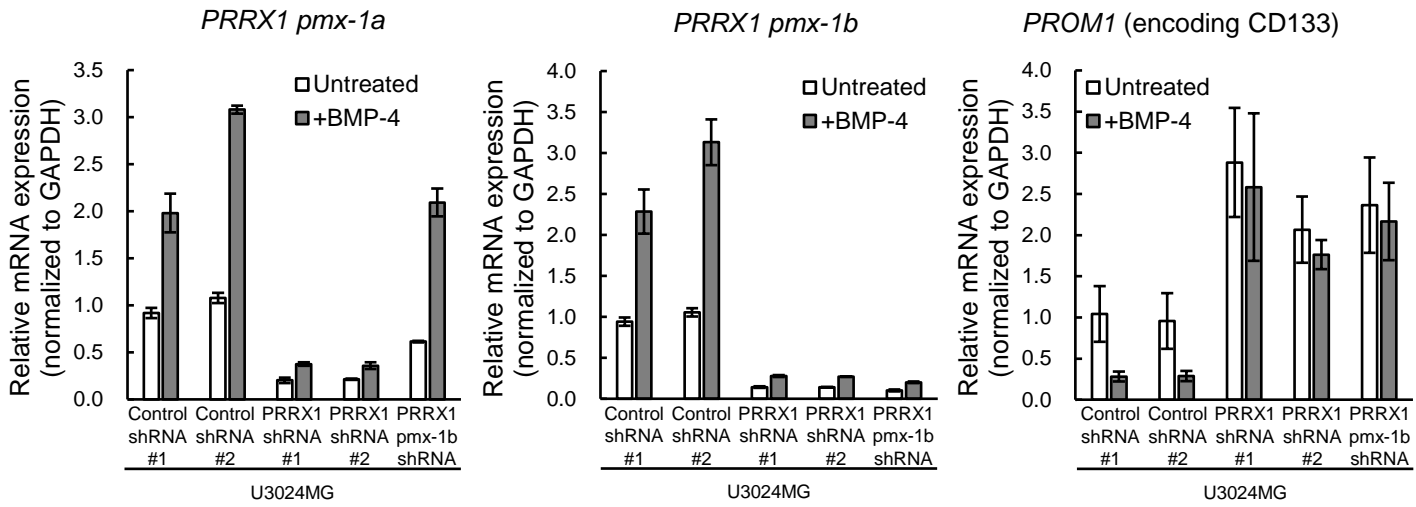

C

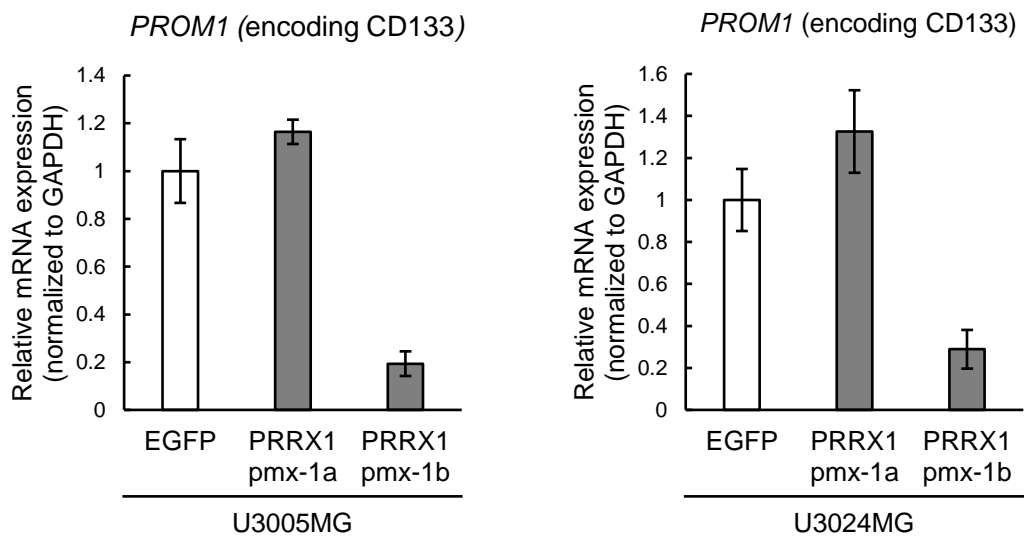

Supplementary Figure S5.

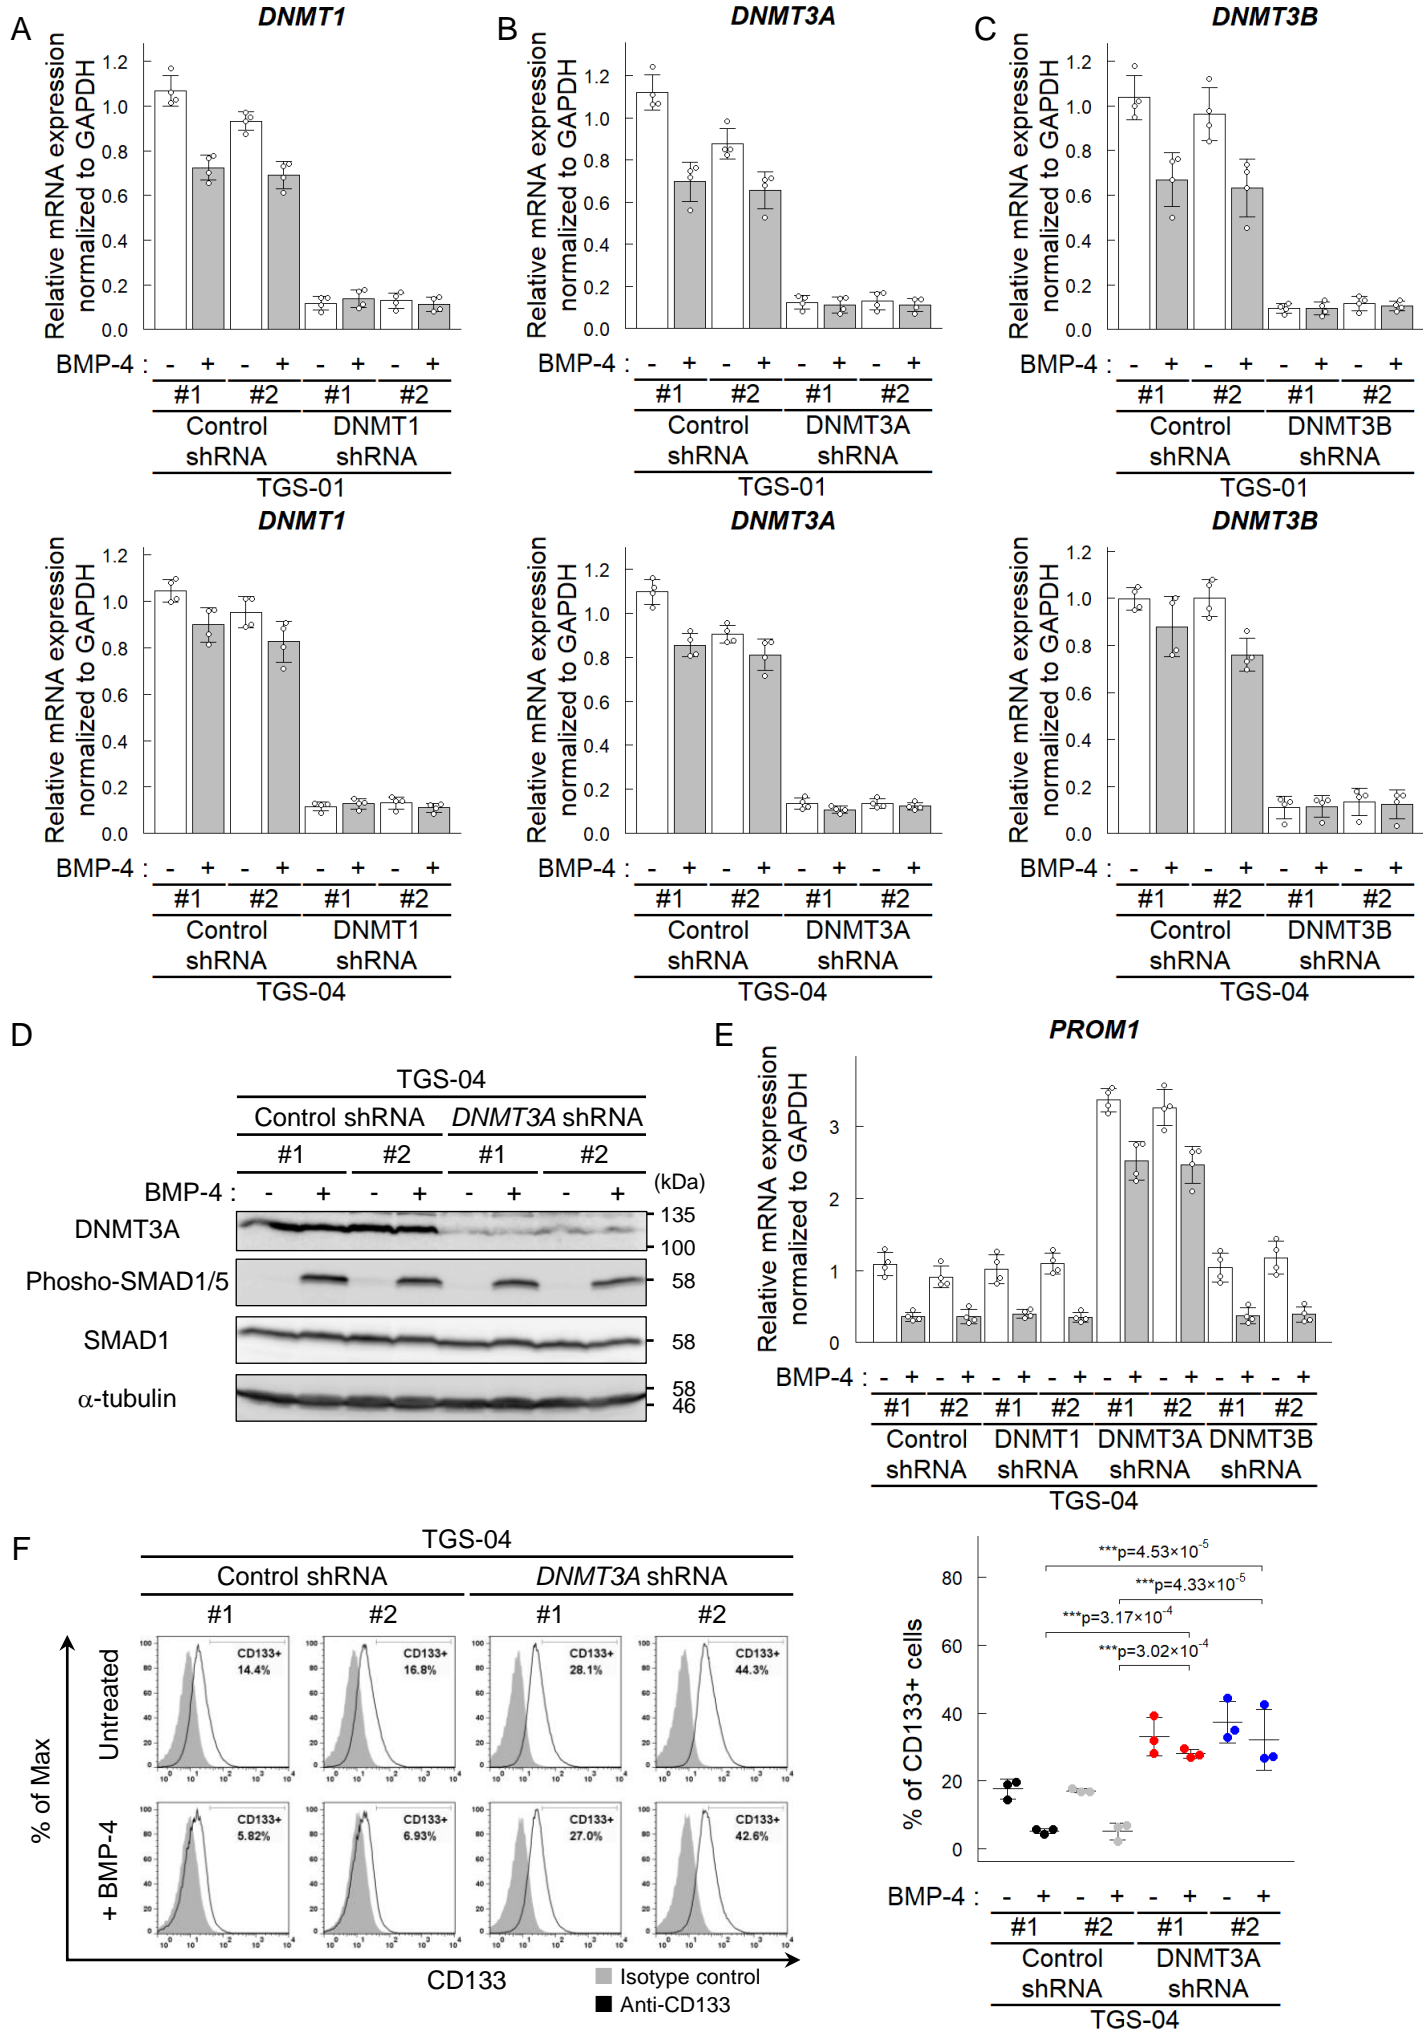

Supplementary Figure S6.

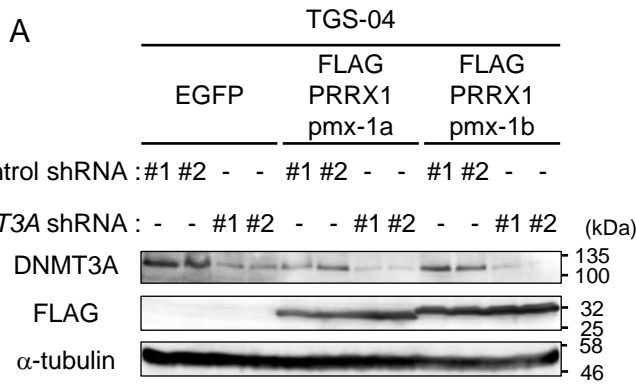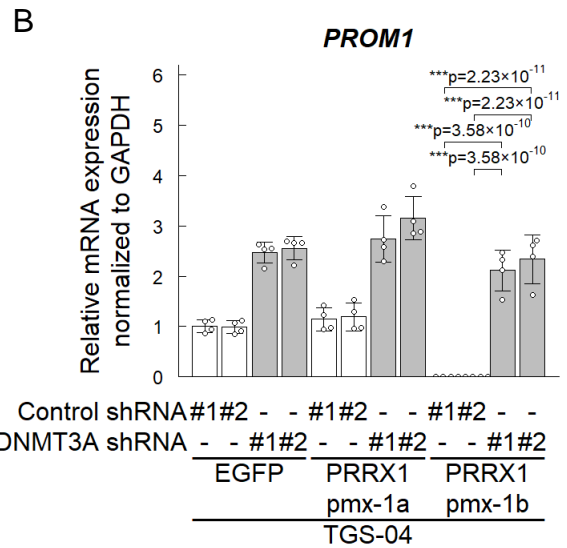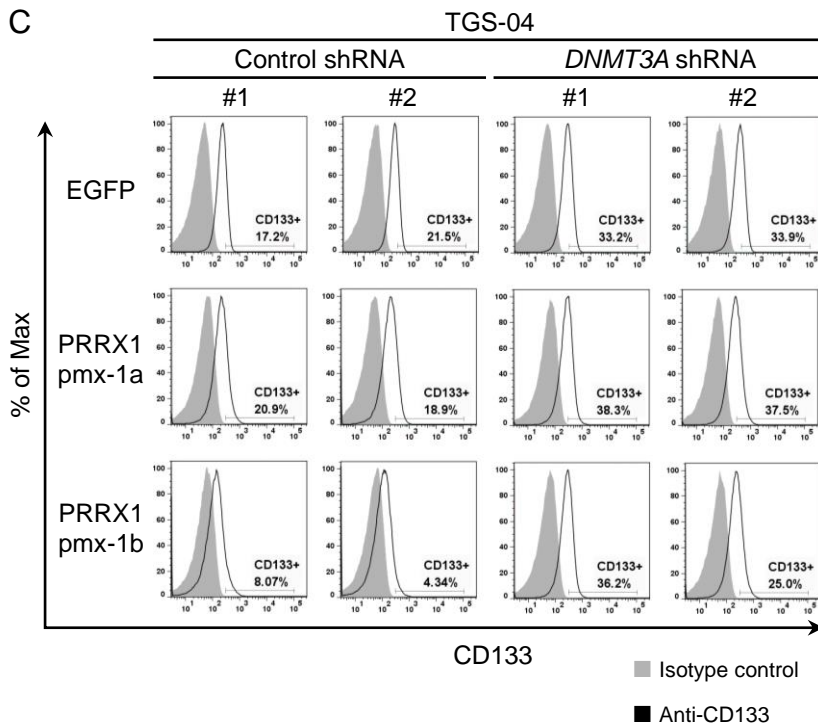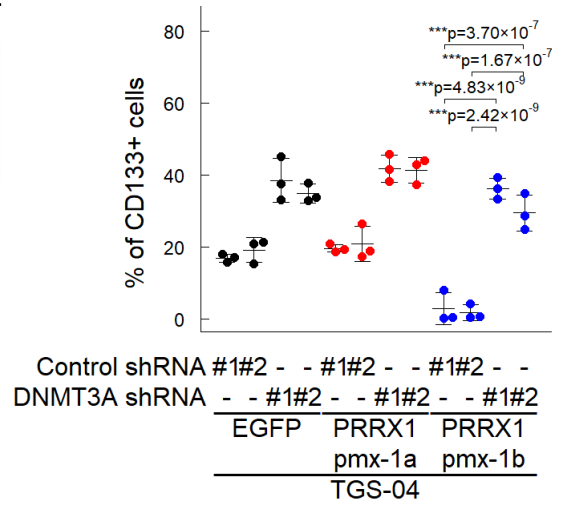

Supplement: MOL2-16-269-s001.pdf [file MOL2-16-269-s001.pdf]
